# Supplementary material for: Quantifying Environmental and Energy Assets for the Geopolitics of Climate Change Mitigation
Source: Research Square preprint supplement (doi:10.21203/rs.3.rs-6932227/v1), 2025-06-30
Supplement: Supplementary file 1 [file 9cf48b3d71d2c764e424a250.xlsx]

## Sheet: Sheet1
ISO3	ClusterName	gdp (2023 USD)	pop_2023
AFG	REE	17233051620	41454761
AGO	FFE	84824654482	36749906
ALB	MIE	23547179830	2745972
ARE	MIE	514130000000	10483751
ARG	MIE	646075000000	45538401
ARM	MIE	24085749592	2990900
AUS	REE	1728060000000	26658948
AUT	MIE	511685000000	9131761
AZE	FFE	72356176471	10153958
BDI	ADE	2642161669	13689450
BEL	MIE	644783000000	11787423
BEN	ADE	19676049076	14111034
BFA	MIE	20324617845	23025776
BGD	MIE	437415000000	171466990
BGR	MIE	102408000000	6446596
BHS	MIE	14338500000	399440
BIH	MIE	27514782476	3185073
BLR	MIE	71857382746	9178298
BLZ	CSE	3066850000	411106
BOL	CSE	45135398009	12244159
BRA	MIE	2173670000000	211140729
BRN	FFE	15128292981	458949
BTN	REE	3.0337e+09	786385
BWA	ADE	19396084498	2480244
CAF	CSE	2555492085	5152421
CAN	FFE	2142470000000	40097761
CHE	MIE	884940000000	8888093
CHL	MIE	335533000000	19658835
CHN	MIE	17794800000000	1410710000
CIV	ADE	78875489245	31165654
CMR	CSE	49279410983	28372687
COD	CSE	66383287003	105789731
COG	CSE	15321055823	6182885
COL	FFE	363494000000	52321152
COM	ADE	1352380971	850387
CPV	MIE	2533819406	522331
CRI	MIE	86497941439	5105525
CUB	MIE	1.58612e+11	11019931
CYP	MIE	33886930712	1344976
CZE	MIE	343208000000	10864042
DEU	MIE	4525700000000	83280000
DJI	ADE	4098530514	1152944
DNK	MIE	407092000000	5946952
DOM	MIE	121444000000	11331265
DZA	FFE	247626000000	46164219
ECU	FFE	118845000000	17980083
EGY	ADE	396002000000	114535772
ERI	REE	2.08183e+09	3470390
ESP	MIE	1620090000000	48347910
EST	MIE	41291245222	1370286
ETH	ADE	163698000000	128691692
FIN	MIE	295532000000	5583911
FJI	CSE	5442046565	924145
FRA	MIE	3051830000000	68287487
GAB	CSE	19388402542	2484789
GBR	MIE	3380850000000	68350000
GEO	MIE	30777833585	3715483
GHA	MIE	76370396722	33787914
GIN	ADE	22199409741	14405468
GMB	ADE	2396111022	2697845
GNB	ADE	2048348108	2153339
GNQ	ADE	12337550584	1847549
GRC	MIE	243498000000	10405588
GTM	ADE	104450000000	18124838
GUY	CSE	17159509565	826353
HKG	MIE	380812000000	7536100
HND	ADE	34400509852	10644851
HRV	MIE	84393795502	3859686
HTI	ADE	19850829758	11637398
HUN	MIE	212389000000	9592186
IDN	MIE	1371170000000	281190067
IND	MIE	3567550000000	1438069596
IRL	MIE	551395000000	5307600
IRN	FFE	404626000000	90608707
IRQ	FFE	250843000000	45074049
ISL	REE	31325116556	393349
ISR	MIE	513611000000	9756600
ITA	MIE	2300940000000	58993475
JAM	MIE	19423355409	2839786
JOR	ADE	50967475352	11439213
JPN	MIE	4204490000000	124516650
KAZ	FFE	262642000000	20330104
KEN	ADE	108039000000	55339003
KGZ	MIE	13987627909	7099750
KHM	ADE	42335646896	17423880
KOR	MIE	1712790000000	51712619
KWT	FFE	163705000000	4853420
LAO	REE	15843155731	7664993
LBN	MIE	1.90508e+10	5773493
LBR	CSE	4240000000	5493031
LBY	FFE	45096462972	7305659
LKA	MIE	84356863744	22037000
LSO	ADE	2117962451	2311472
LTU	MIE	79789877416	2871585
LUX	MIE	85755006124	666430
LVA	MIE	42247850065	1877445
MAR	ADE	144417000000	37712505
MDA	MIE	16539436547	2457783
MDG	CSE	15790113247	31195932
MEX	ADE	1789110000000	129739759
MKD	MIE	15763621848	1827816
MLI	REE	20661794596	23769127
MMR	FFE	66757619000	54133798
MNE	MIE	7530593375	616177
MNG	REE	20325121394	3481145
MOZ	ADE	20954220984	33635160
MRT	REE	10651709411	5022441
MUS	MIE	14644524819	1261041
MWI	ADE	12712150082	21104482
MYS	FFE	399705000000	35126298
NAM	REE	12351025067	2963095
NCL	MIE	9.19522e+09	289870
NER	REE	16819170421	26159867
NGA	ADE	363846000000	227882945
NIC	CSE	17829218219	6823613
NLD	MIE	1154360000000	17877117
NOR	FFE	485311000000	5519594
NPL	REE	40908073367	29694614
NZL	MIE	252176000000	5223100
OMN	FFE	108811000000	5049269
PAK	ADE	337912000000	247504495
PAN	MIE	83318176900	4458759
PER	MIE	267603000000	33845617
PHL	ADE	437146000000	114891199
PNG	CSE	30729242919	10389635
POL	MIE	809201000000	36687353
PRI	MIE	117902000000	3205691
PRT	MIE	289114000000	10578174
PRY	CSE	42956263544	6844146
PSE	ADE	17420800000	5165775
PYF	MIE	5.49703e+09	281118
QAT	FFE	213003000000	2656032
ROU	MIE	350776000000	19059479
RUS	FFE	2021420000000	143826130
RWA	ADE	14097768472	13954471
SAU	FFE	1067580000000	33264292
SDN	ADE	109266000000	50042791
SEN	ADE	30848333084	18077573
SLB	CSE	1633319401	800005
SLE	ADE	6411869546	8460512
SLV	ADE	34015620000	6309624
SOM	REE	10968517090	18358615
SRB	MIE	81342660752	6623183
SUR	CSE	3455146281	628886
SVK	MIE	132908000000	5426740
SVN	MIE	69148468417	2120461
SWE	MIE	584960000000	10536632
SWZ	ADE	4442875788	1230506
SYR	ADE	3.8879e+10	23594623
TCD	REE	13149325362	19319064
TGO	MIE	9171261838	9304337
THA	MIE	514969000000	71702435
TJK	MIE	12060602009	10389799
TKM	FFE	60628857143	7364438
TLS	ADE	2079916900	1384286
TTO	FFE	27372285698	1367510
TUN	ADE	48529595417	12200431
TUR	MIE	1118250000000	85325965
TZA	ADE	79062403821	66617606
UGA	ADE	48768955863	48656601
UKR	MIE	178757000000	37732836
URY	MIE	77240830877	3388081
USA	MIE	27720700000000	334914895
UZB	MIE	101592000000	35652307
VEN	FFE	5.28084e+11	28300854
VNM	MIE	429717000000	100352192
VUT	CSE	1126313359	320409
WSM	MIE	9.38189e+08	216663
YEM	ADE	2.42224e+10	39390799
ZAF	FFE	380699000000	63212384
ZMB	ADE	27577956471	20723965
ZWE	ADE	35231367886	16340822
These countries lack recent GDP data in the World Bank database. For VEN, YEM, CUB and ERI, GDP was estimated using the most recent GDP (2014), adjusted by the regional growth rate. For the other countries, GDP was estimated based on their reported 2022 GDP growth rates.
Cluster	Cluster_GDP	World_GDP	GDP_Percentage	Cluster_POP	World_POP	POP_Percentage	Number
FFE	9.53103e+12	1.06172e+14	0.08977	751918566	8061876001	0.0932684	23
ADE	4.71384e+12	1.06172e+14	0.0443982	1599322963	8061876001	0.198381	41
CSE	341491069545	1.06172e+14	0.0032164	224883933	8061876001	0.0278947	17
REE	1.94341e+12	1.06172e+14	0.0183044	209196794	8061876001	0.0259489	14
MIE	8.83158e+13	1.06172e+14	0.831821	5201097328	8061876001	0.645147	77
