# Supplementary material for: Quantifying Environmental and Energy Assets for the Geopolitics of Climate Change Mitigation
Source: Research Square preprint supplement (doi:10.21203/rs.3.rs-6932227/v1), 2025-06-30
Supplement: Supplementary file 2 [file cdf4d1f4f96f16ca9bad7cb9.xlsx]

## Sheet: Sheet1
ISO3	retot	fftot	cstot	dmg	SubDimension
AFG	0.0512241	-7.07596e-05	0.0129669	0.00774578	end_stringent
AGO	0.00665589	-0.0345701	0.00418365	0.0105548	end_stringent
ALB	0.00408	-0.00327439	0.00604828	0.00338283	end_stringent
ARE	0.00138416	-0.00912428	0.000178788	0.00509666	end_stringent
ARG	0.0099675	-0.00760015	0.0223206	0.00422358	end_stringent
ARM	0.00551376	0	0.0123067	0.00368617	end_stringent
AUS	0.065902	-0.0113857	0.00685736	0.00452368	end_stringent
AUT	0.00191044	-0.000412639	0.00440436	0.00248784	end_stringent
AZE	0.00546226	-0.0249147	0.00497299	0.00567599	end_stringent
BDI	0.0136612	0	0.0275516	0.0127327	end_stringent
BEL	0.00249761	0	0.000928714	0.00235005	end_stringent
BEN	0.0113749	0	0.00529531	0.00828144	end_stringent
BFA	0.0128705	0	-0.0023214	0.00353947	end_stringent
BGD	0.0106746	-0.00338693	0.000265188	0.00203007	end_stringent
BGR	0.00580614	-0.00263807	0.00708917	0.00371822	end_stringent
BHS	0.0133103	0	0.00170914	0.00394417	end_stringent
BIH	0.0061726	-0.00362898	0.00887786	0.00286372	end_stringent
BLR	0.00193899	0	0.00630267	0.00248879	end_stringent
BLZ	0.00775049	0	0.061716	0.00808765	end_stringent
BOL	0.00295007	-0.00922137	0.0957413	0.0102512	end_stringent
BRA	0.0019477	-0.00658718	0.0411716	0.00620118	end_stringent
BRN	0.000664507	-0.214684	0.00454584	0.00361239	end_stringent
BTN	0.602504	0	0.0124766	0.00358911	end_stringent
BWA	0.0130377	-0.00471766	0.0126461	0.00940689	end_stringent
CAF	0.0201655	0	0.459418	0.0113862	end_stringent
CAN	0.0285619	-0.0327471	0.100808	0.00349346	end_stringent
CHE	0.00190489	0	0.000492811	0.00230569	end_stringent
CHL	0.00223728	-0.000151669	0.0114509	0.00206608	end_stringent
CHN	0.00664919	-0.00812945	0.00365799	0.0031551	end_stringent
CIV	0.0034037	-0.00027018	0.0103432	0.00848479	end_stringent
CMR	0.00798783	-2.30811e-05	0.0398947	0.00919567	end_stringent
COD	0.0136671	0	0.0722796	0.0130913	end_stringent
COG	0.00436526	-0.0116013	0.0599791	0.0071816	end_stringent
COL	0.000703576	-0.0133387	0.0217616	0.00740265	end_stringent
COM	9.08924e-05	0	0.00344837	0.00795746	end_stringent
CPV	-0.0180487	0	0.00391019	0.00376306	end_stringent
CRI	0.000170184	0	0.00477821	0.0058239	end_stringent
CUB	0.00144995	-0.00290792	0.00705296	0.00375438	end_stringent
CYP	0.000686354	0	0.00155144	0.00403472	end_stringent
CZE	0.00262964	-0.000947947	0.00271086	0.00271021	end_stringent
DEU	0.00201841	-0.000655959	0.00190341	0.00218017	end_stringent
DJI	0.0174765	0	0.00497608	0.00525166	end_stringent
DNK	0.00639068	-0.00315743	0.00178876	0.00257249	end_stringent
DOM	0.000665523	0	0.00168274	0.00507636	end_stringent
DZA	0.0142232	-0.0202187	0.0039256	0.00667676	end_stringent
ECU	0.000537239	-0.012699	0.0169935	0.005773	end_stringent
EGY	0.00749192	-0.00505937	0.000160813	0.00724584	end_stringent
ERI	0.085673	0	0.0303493	0.0106383	end_stringent
ESP	0.00318187	0	0.00238884	0.00235857	end_stringent
EST	0.00432802	0	0.0142635	0.0029923	end_stringent
ETH	0.0137253	0	0.0208401	0.00982084	end_stringent
FIN	0.00229909	0	0.0206125	0.00311304	end_stringent
FJI	-0.000942222	0	0.0685138	0.00398433	end_stringent
FRA	0.0023915	0	0.0021946	0.00158308	end_stringent
GAB	0.00185697	-0.0016879	0.126801	0.00713838	end_stringent
GBR	0.00288884	-0.00373643	0.00156896	0.00100437	end_stringent
GEO	0.00442631	0	0.0148308	0.00338903	end_stringent
GHA	0.00590582	0	0.00609864	0.00117762	end_stringent
GIN	0.00604135	0	0.00605305	0.0115721	end_stringent
GMB	0.00515668	0	-0.00119056	0.00766896	end_stringent
GNB	0.0254777	0	-0.0148548	0.00834794	end_stringent
GNQ	0.00115327	0	0.00791909	0.00671254	end_stringent
GRC	0.00199056	-0.000546377	0.00274328	0.0040027	end_stringent
GTM	0.0010611	-0.000150419	0.00407395	0.00954907	end_stringent
GUY	0.0108866	0	1.14236	0.00657717	end_stringent
HKG	5.79646e-06	0	2.83785e-05	0.00212132	end_stringent
HND	0.00188863	0	0.0174979	0.0092403	end_stringent
HRV	0.00444515	0	-0.000882339	0.00273571	end_stringent
HTI	0.000276369	0	0.00326121	0.00637559	end_stringent
HUN	0.0048341	-0.000559381	0.0018065	0.0031187	end_stringent
IDN	0.00596541	-0.0104093	0.0158768	0.005414	end_stringent
IND	0.00948891	-0.00404781	0.000255808	0.00294029	end_stringent
IRL	0.00613794	-0.000229575	0.00380077	0.00179562	end_stringent
IRN	0.0073791	-0.0329319	0.00358145	0.00592668	end_stringent
IRQ	0.0127995	-0.0265919	0.00242083	0.00730512	end_stringent
ISL	0.0797159	0	0.0123315	0.00334191	end_stringent
ISR	0.000650107	-0.00238786	8.18244e-05	0.00606543	end_stringent
ITA	0.00174377	-0.000683534	0.00135855	0.00291707	end_stringent
JAM	0.00106606	0	0.00681257	0.00506885	end_stringent
JOR	0.00675165	0	0.000985212	0.0080316	end_stringent
JPN	0.000540579	-2.9925e-05	0.00118661	0.00340567	end_stringent
KAZ	0.0284456	-0.0135756	0.0409452	0.00283009	end_stringent
KEN	0.0143138	0	0.0138449	0.00698624	end_stringent
KGZ	0.015385	-0.000267948	0.0437452	0.00354823	end_stringent
KHM	0.0110305	0	0.0174337	0.00713752	end_stringent
KOR	0.00298013	0	0.000408334	0.00300394	end_stringent
KWT	0.00105246	-0.0298363	0.000158741	0.00503314	end_stringent
LAO	0.026035	-0.00451589	0.0584489	0.00572051	end_stringent
LBN	0.00133281	0	0.00036128	0.00488792	end_stringent
LBR	0.0062277	0	0.0297143	0.0106384	end_stringent
LBY	0.0519079	-0.0408112	-0.000688105	0.00612366	end_stringent
LKA	0.0026922	0	0.00456262	0.00522468	end_stringent
LSO	0.00735201	0	0.0226363	0.00904637	end_stringent
LTU	0.00516394	0	0.0124617	0.00214401	end_stringent
LUX	0.00329413	0	0.000555685	0.00217116	end_stringent
LVA	0.00634552	0	0.0238254	0.00244326	end_stringent
MAR	0.00529609	0	0.00252666	0.0064921	end_stringent
MDA	0.00898311	0	0.00250804	0.00340425	end_stringent
MDG	0.0157488	0	0.0365039	0.00917829	end_stringent
MEX	0.00110631	-0.0062694	0.00361894	0.00723492	end_stringent
MKD	0.00743563	-0.00199218	0.00459022	0.00413578	end_stringent
MLI	0.0526397	0	0.000560044	0.00862149	end_stringent
MMR	0.023759	-0.0112343	0.0400952	0.00320104	end_stringent
MNE	0.0107232	-0.00243706	0.0133331	0.00312736	end_stringent
MNG	0.504872	-0.0185199	0.0955984	0.00403004	end_stringent
MOZ	0.0116868	-0.00608501	0.000423792	0.00924305	end_stringent
MRT	0.21822	0	0.0169201	0.00916274	end_stringent
MUS	0.00558459	0	5.9434e-05	0.00369982	end_stringent
MWI	0.010109	0	-0.00336162	0.0103844	end_stringent
MYS	0.00259155	-0.0265051	0.0110308	0.00538663	end_stringent
NAM	0.090137	0	0.0495768	0.00864686	end_stringent
NCL	0.00196609	0	0.0262664	0.00399496	end_stringent
NER	0.0525344	-0.000258301	0.00829238	0.0103229	end_stringent
NGA	0.00677706	-0.00528622	0.000973216	0.00904055	end_stringent
NIC	0.00219356	0	0.0435044	0.00974036	end_stringent
NLD	0.00114888	-0.00100938	0.000451273	0.00237688	end_stringent
NOR	0.0111033	-0.0754844	0.00697624	0.00275192	end_stringent
NPL	0.0420813	0	0.00513226	0.00554683	end_stringent
NZL	0.0110078	-0.00194509	0.0239149	0.00267934	end_stringent
OMN	0.0151175	-0.0328336	0.00138741	0.00490941	end_stringent
PAK	0.0190097	-0.00390558	0.000165487	0.0062428	end_stringent
PAN	0.000153225	0	0.0124745	0.00533026	end_stringent
PER	0.000613942	-0.00475538	0.0404186	0.00566388	end_stringent
PHL	0.00200253	-0.00142341	0.00500776	0.00663341	end_stringent
PNG	0.00355263	-0.00230931	0.117971	0.00546325	end_stringent
POL	0.00387269	-0.00166117	0.00483807	0.00243135	end_stringent
PRI	0.000123761	0	0.00197547	0.00327117	end_stringent
PRT	0.00192312	0	0.0013776	0.00402853	end_stringent
PRY	0.00260861	0	0.0688321	0.00926118	end_stringent
PSE	0.00441713	0	0.000123096	0.00739343	end_stringent
PYF	0.000186812	0	0	0.00279644	end_stringent
QAT	0.000962863	-0.037189	3.71744e-05	0.00361801	end_stringent
ROU	0.00657866	-0.00318473	0.00831428	0.00325631	end_stringent
RUS	0.00610599	-0.0172578	0.0546156	0.00323839	end_stringent
RWA	0.0104702	0	0.0044091	0.0105174	end_stringent
SAU	0.00772474	-0.0313912	0.0023599	0.00544139	end_stringent
SDN	0.0315671	0	0.00305795	0.0109827	end_stringent
SEN	0.0108706	0	-0.00347638	0.00580009	end_stringent
SLB	-0.00118918	0	0.0751304	0.00623767	end_stringent
SLE	0.00901861	0	0.0129655	0.0118675	end_stringent
SLV	0.000364624	0	0.0041735	0.00804677	end_stringent
SOM	1.10858	0	0.582522	0.0109276	end_stringent
SRB	0.0104751	-0.00580225	0.0057705	0.0033082	end_stringent
SUR	0.0102689	0	0.676955	0.00590515	end_stringent
SVK	0.0029619	0	0.00477139	0.00274773	end_stringent
SVN	0.00291686	-0.000344081	0.00233149	0.0027617	end_stringent
SWE	0.00236954	0	0.0166378	0.00276749	end_stringent
SWZ	0.0187239	0	0.00685053	0.00857942	end_stringent
SYR	0.00519775	-0.000529617	0.00133833	0.00849764	end_stringent
TCD	0.0643799	-0.00374203	0.00136902	0.00584586	end_stringent
TGO	0.00904469	0	0.0135841	0.00236599	end_stringent
THA	0.00398819	-0.00718592	0.00418229	0.00564825	end_stringent
TJK	0.0134291	0	0.0219121	0.00388254	end_stringent
TKM	0.0172559	-0.0184063	0.0159171	0.00427813	end_stringent
TLS	0.0186894	0	-0.00275664	0.00695459	end_stringent
TTO	0.000514782	-0.0478038	0.00422428	0.00304201	end_stringent
TUN	0.00917887	-0.000740971	0.000803209	0.00646722	end_stringent
TUR	0.00260002	-0.000629176	0.00368992	0.00489746	end_stringent
TZA	0.00833483	-0.000165087	0.0120564	0.00828005	end_stringent
UGA	0.0107722	0	0.00674988	0.00958024	end_stringent
UKR	0.00416427	-0.00140271	0.00220123	0.00377828	end_stringent
URY	0.00844383	0	0.0165053	0.00324123	end_stringent
USA	0.00536322	-0.0102582	0.00553251	0.00506696	end_stringent
UZB	0.0113543	-0.000343742	0.00651791	0.00357274	end_stringent
VEN	0.0010437	-0.0263557	0.0277995	0.00691923	end_stringent
VNM	0.0110316	-0.00849292	0.00566577	0.00512004	end_stringent
VUT	1.5185e-05	0	0.0851512	0.00609806	end_stringent
WSM	0.0042491	0	0.0357026	0.00446684	end_stringent
YEM	0.0159802	0	0.00161746	0.00576547	end_stringent
ZAF	0.00789151	-0.0206338	0.00647797	0.00748793	end_stringent
ZMB	0.00723187	0	-0.00480042	0.0127158	end_stringent
ZWE	0.0156667	-0.00545638	-0.00761206	0.0146845	end_stringent
AFG	0.00092401	-3.07172e-05	0.00372045	0.000489453	mid_moderate
AGO	0.000103391	-0.00318721	-0.0021086	0.000533599	mid_moderate
ALB	4.61699e-05	-0.000180993	0.00116555	0.000224718	mid_moderate
ARE	1.01345e-05	-0.000565006	2.36997e-05	0.000706121	mid_moderate
ARG	5.36793e-05	-0.00101309	0.00218383	0.000313547	mid_moderate
ARM	5.93728e-05	0	0.000560561	-4.74361e-05	mid_moderate
AUS	0.000148416	-0.00176868	0.00130267	-3.62618e-05	mid_moderate
AUT	2.02808e-05	-2.14857e-05	0.00041764	7.77386e-05	mid_moderate
AZE	4.43453e-05	-0.000862771	0.000295813	-3.12069e-05	mid_moderate
BDI	0.00046753	0	0.00192347	0.000965439	mid_moderate
BEL	2.80853e-05	0	0.000124302	0.000124961	mid_moderate
BEN	0.000283831	0	0.00358175	0.00104197	mid_moderate
BFA	0.000337202	0	0.001944	0.000194161	mid_moderate
BGD	0.000143646	-0.000565521	-0.000270756	-0.000222997	mid_moderate
BGR	6.42668e-05	-0.000565709	0.00138786	0.000184771	mid_moderate
BHS	8.76029e-06	0	-0.00113125	0.000302542	mid_moderate
BIH	7.69982e-05	-0.000755376	0.00148542	3.79575e-05	mid_moderate
BLR	1.59526e-05	0	0.000237689	0.000354742	mid_moderate
BLZ	0.000201004	0	0.00632501	0.000339899	mid_moderate
BOL	4.5162e-05	-0.00184805	0.00532334	0.000324118	mid_moderate
BRA	2.22701e-05	-0.000771155	0.00383701	0.000607227	mid_moderate
BRN	7.0647e-06	-0.0215423	-0.00108016	0.000442959	mid_moderate
BTN	0.00773408	0	0.0016686	-0.000684862	mid_moderate
BWA	0.000104676	-0.00087806	1.46506e-05	0.000893889	mid_moderate
CAF	0.000561792	0	0.176514	0.00102332	mid_moderate
CAN	7.69238e-05	-0.00173123	0.0111825	7.14017e-05	mid_moderate
CHE	2.27148e-05	0	1.89354e-05	0.000108218	mid_moderate
CHL	1.90506e-05	-2.12296e-05	0.000740746	0.000115499	mid_moderate
CHN	5.1593e-05	-0.000981564	0.000203176	-0.000534482	mid_moderate
CIV	8.3123e-05	-8.622e-05	0.00252146	0.000482616	mid_moderate
CMR	0.000167554	-6.92823e-06	0.0100977	0.000564433	mid_moderate
COD	0.000506387	0	-0.0834529	0.000873997	mid_moderate
COG	7.71234e-05	-0.00114981	0.0136267	0.000584643	mid_moderate
COL	1.69146e-05	-0.00181021	0.00329424	0.000348999	mid_moderate
COM	1.69292e-05	0	0.000600053	0.000294671	mid_moderate
CPV	5.9966e-05	0	8.78914e-05	3.10362e-05	mid_moderate
CRI	3.75052e-06	0	-0.000763208	0.000545432	mid_moderate
CUB	1.57028e-05	-0.000321623	-8.79916e-05	0.000182283	mid_moderate
CYP	1.93514e-06	0	0.00043176	0.000134792	mid_moderate
CZE	2.89656e-05	-0.000214643	0.000342863	0.000216675	mid_moderate
DEU	2.12413e-05	-0.000100318	0.000234559	3.40731e-05	mid_moderate
DJI	0.000196042	0	0.00132579	0.00116677	mid_moderate
DNK	1.33805e-05	-0.000169164	0.00018326	0.000105726	mid_moderate
DOM	1.49247e-05	0	0.000245266	0.000188657	mid_moderate
DZA	0.000119935	-0.00234589	0.00054301	-0.000153441	mid_moderate
ECU	1.40837e-05	-0.0018677	0.00237418	0.000256309	mid_moderate
EGY	9.94259e-05	-0.000844293	4.72768e-05	-0.000123109	mid_moderate
ERI	0.00160323	0	0.0146994	0.00074027	mid_moderate
ESP	2.57022e-05	0	0.000597428	-0.000205338	mid_moderate
EST	2.43178e-05	0	0.0005857	0.000143664	mid_moderate
ETH	0.000367712	0	0.0024417	0.000792901	mid_moderate
FIN	1.0449e-05	0	0.00124272	3.0483e-05	mid_moderate
FJI	5.70758e-05	0	0.0151627	-8.87799e-05	mid_moderate
FRA	2.38308e-05	0	0.00043414	-0.000158584	mid_moderate
GAB	2.1775e-05	-0.000122904	0.0194747	0.000471116	mid_moderate
GBR	1.27421e-05	-0.000186763	9.80326e-05	1.12942e-05	mid_moderate
GEO	4.99131e-05	0	0.000759762	0.000185815	mid_moderate
GHA	0.00012815	0	0.00174619	5.85684e-05	mid_moderate
GIN	0.000108134	0	0.00229114	0.00103832	mid_moderate
GMB	6.2087e-05	0	-7.37593e-05	0.000873711	mid_moderate
GNB	0.000165623	0	-0.00129353	0.000896376	mid_moderate
GNQ	2.05501e-05	0	0.00162145	0.000518387	mid_moderate
GRC	1.40894e-05	-0.000117751	0.000660207	5.60821e-05	mid_moderate
GTM	3.36393e-05	-2.85877e-05	-0.000363508	0.000301556	mid_moderate
GUY	9.48687e-05	0	0.106067	0.000387043	mid_moderate
HKG	3.04735e-08	0	6.04499e-07	0.000234318	mid_moderate
HND	4.62028e-05	0	0.00257741	7.92303e-06	mid_moderate
HRV	3.99803e-05	0	0.00142839	-2.82455e-05	mid_moderate
HTI	9.68737e-06	0	0.000652231	0.000207902	mid_moderate
HUN	5.53086e-05	-7.32465e-05	0.000784354	0.000156511	mid_moderate
IDN	2.84785e-05	-0.00157235	0.00127067	8.01956e-05	mid_moderate
IND	0.000103533	-0.000716177	0.000115926	-4.01729e-05	mid_moderate
IRL	1.23772e-05	-6.206e-06	0.000387129	2.76776e-05	mid_moderate
IRN	7.86038e-05	-0.00401823	0.000602237	0.000770888	mid_moderate
IRQ	0.000180407	-0.00220474	0.000581483	-0.000131771	mid_moderate
ISL	9.03214e-05	0	0.000368878	5.22557e-06	mid_moderate
ISR	8.92001e-06	-0.000464264	1.65746e-05	-7.77165e-05	mid_moderate
ITA	1.68106e-05	-3.19329e-05	0.000250136	0.000223362	mid_moderate
JAM	1.36415e-05	0	0.000812121	0.000215973	mid_moderate
JOR	0.000114988	0	0.000301484	-0.00015434	mid_moderate
JPN	5.62332e-06	-6.72016e-07	0.000204605	6.2618e-05	mid_moderate
KAZ	5.30074e-05	-0.00107075	0.00202323	-5.58288e-06	mid_moderate
KEN	0.000296427	0	0.00278432	0.000204378	mid_moderate
KGZ	0.000221806	-0.000103444	0.00302983	-6.98851e-05	mid_moderate
KHM	0.000109169	0	-0.00102231	0.000772506	mid_moderate
KOR	2.66812e-06	0	-0.000302081	-0.000197373	mid_moderate
KWT	8.58671e-06	-0.001887	3.14815e-05	0.000110535	mid_moderate
LAO	0.000438418	-0.00105197	-0.0020509	-0.000343677	mid_moderate
LBN	1.79372e-05	0	5.12707e-05	-6.44664e-05	mid_moderate
LBR	0.000215537	0	0.00700499	0.000374443	mid_moderate
LBY	0.000226424	-0.00301302	0.000504795	-0.00065129	mid_moderate
LKA	3.23198e-05	0	-5.33127e-05	0.000232248	mid_moderate
LSO	0.000181224	0	0.00519519	0.00136738	mid_moderate
LTU	4.2148e-05	0	0.000665089	6.98946e-05	mid_moderate
LUX	3.65338e-05	0	6.57653e-05	0.000133223	mid_moderate
LVA	3.11507e-05	0	0.00069739	4.63074e-05	mid_moderate
MAR	7.03675e-05	0	0.000457084	-1.33259e-06	mid_moderate
MDA	8.98571e-05	0	0.000248022	0.000254015	mid_moderate
MDG	0.000405979	0	0.0109444	6.55621e-05	mid_moderate
MEX	1.94059e-05	-0.00084784	0.000609346	-7.21999e-06	mid_moderate
MKD	9.10719e-05	-0.000471998	0.00106955	0.000231346	mid_moderate
MLI	0.000901573	0	0.00712171	0.00058897	mid_moderate
MMR	0.000135474	-0.00126406	0.00323751	-0.00033575	mid_moderate
MNE	0.000119328	-0.000527713	0.00111118	0.00025727	mid_moderate
MNG	0.00393594	-0.00386419	0.00827553	0.000121562	mid_moderate
MOZ	0.000247016	-0.00268641	4.98485e-05	0.000307294	mid_moderate
MRT	0.001539	0	0.00721519	0.000576942	mid_moderate
MUS	1.00555e-05	0	3.7514e-06	0.000375077	mid_moderate
MWI	0.00033517	0	-0.00027942	0.000171508	mid_moderate
MYS	8.0541e-06	-0.00307044	-0.000631534	9.03971e-05	mid_moderate
NAM	0.000270957	0	0.00278065	0.00116521	mid_moderate
NCL	1.09752e-05	0	0.0132273	-0.00012098	mid_moderate
NER	0.00130535	-0.000193339	0.0099751	0.000370464	mid_moderate
NGA	0.000150962	-0.00115483	0.000483852	0.000393063	mid_moderate
NIC	3.54754e-05	0	0.0078747	0.000265063	mid_moderate
NLD	7.18422e-06	-2.83791e-05	5.64711e-05	-4.99736e-06	mid_moderate
NOR	9.49116e-06	-0.00359324	0.000697402	8.99817e-05	mid_moderate
NPL	0.000735281	0	0.000472658	-0.000608423	mid_moderate
NZL	4.49166e-05	-8.86999e-05	0.0034817	4.13991e-05	mid_moderate
OMN	7.93364e-05	-0.00398	0.000274675	0.000282539	mid_moderate
PAK	0.000235351	-0.000724937	0.000365184	0.000155159	mid_moderate
PAN	2.1439e-06	0	0.000744686	0.0004712	mid_moderate
PER	9.59064e-06	-0.000677232	0.00419775	0.000226007	mid_moderate
PHL	2.49589e-05	-0.000269154	0.000437264	0.000253749	mid_moderate
PNG	9.7709e-05	-0.000408389	0.0248656	0.000107771	mid_moderate
POL	4.05687e-05	-0.000263249	0.000460532	0.0001433	mid_moderate
PRI	5.15217e-07	0	0.000155519	0.000369384	mid_moderate
PRT	1.97892e-05	0	0.00053551	-0.000442443	mid_moderate
PRY	6.47233e-05	0	0.00909755	-4.41301e-06	mid_moderate
PSE	-6.03004e-06	0	4.7987e-05	-8.95467e-05	mid_moderate
PYF	6.778e-07	0	0	0.000205626	mid_moderate
QAT	5.36116e-07	-0.00459684	6.69515e-06	0.000433155	mid_moderate
ROU	7.29326e-05	-0.000296634	0.0014761	0.000246794	mid_moderate
RUS	2.2817e-05	-0.00127067	0.00301944	0.000192878	mid_moderate
RWA	0.000261968	0	0.000453623	0.000889764	mid_moderate
SAU	5.6969e-05	-0.00208247	0.000365012	0.000342646	mid_moderate
SDN	0.000475178	0	0.00201743	0.000317872	mid_moderate
SEN	0.000203814	0	0.000591309	0.000881461	mid_moderate
SLB	6.91437e-05	0	-0.0215833	0.000114661	mid_moderate
SLE	0.000208195	0	0.00554856	0.000701929	mid_moderate
SLV	8.93767e-06	0	0.000273781	8.86623e-05	mid_moderate
SOM	0.0234008	0	0.328725	0.00100104	mid_moderate
SRB	0.000122284	-0.00125728	0.00118898	0.000509128	mid_moderate
SUR	1.92711e-05	0	0.0688109	0.000506936	mid_moderate
SVK	3.36064e-05	0	0.000674995	0.000146293	mid_moderate
SVN	3.2046e-05	-7.3823e-05	0.000735458	1.7692e-05	mid_moderate
SWE	1.00632e-05	0	0.00185063	9.69183e-05	mid_moderate
SWZ	0.000357173	0	0.00138186	0.000571758	mid_moderate
SYR	9.45359e-05	-4.94058e-05	0.000294766	-4.77854e-05	mid_moderate
TCD	0.000961133	-0.000644079	0.00926387	0.00016042	mid_moderate
TGO	0.000257112	0	0.00387659	0.000894409	mid_moderate
THA	3.10056e-05	-0.000817367	-0.000346482	0.000214811	mid_moderate
TJK	0.000168869	0	0.00187544	-0.000138551	mid_moderate
TKM	5.08353e-05	-0.00153726	0.00110274	0.000561273	mid_moderate
TLS	4.11231e-05	0	5.73291e-05	2.57753e-05	mid_moderate
TTO	4.00598e-07	-0.00510683	0.000350095	0.000239124	mid_moderate
TUN	5.34135e-05	-0.00011802	0.000193639	-3.15049e-05	mid_moderate
TUR	2.56125e-05	-0.000127224	0.000633588	0.000130669	mid_moderate
TZA	0.000205832	-6.33658e-05	0.00260014	9.83841e-05	mid_moderate
UGA	0.000312901	0	-0.00260015	0.000925806	mid_moderate
UKR	3.81195e-05	-0.000258909	0.00020054	0.000125443	mid_moderate
URY	3.29337e-05	0	0.0022065	0.000664377	mid_moderate
USA	3.22205e-05	-0.000484347	0.00100063	6.86463e-05	mid_moderate
UZB	8.5254e-05	-0.000114967	0.00052392	5.88156e-05	mid_moderate
VEN	1.79643e-05	-0.00344138	0.00269048	0.000148785	mid_moderate
VNM	6.8064e-05	-0.0011406	-0.000125487	-0.000114046	mid_moderate
VUT	6.86682e-05	0	0.022379	-0.000118865	mid_moderate
WSM	7.38852e-05	0	0.0108444	0.000178666	mid_moderate
YEM	0.00029316	0	0.000859158	0.000952184	mid_moderate
ZAF	4.71064e-05	-0.00390533	0.000896302	0.000753859	mid_moderate
ZMB	0.000185761	0	-0.0118844	0.000690418	mid_moderate
ZWE	0.000535552	-0.00247318	-0.00234493	0.00225987	mid_moderate
AFG	0.00123761	-2.86927e-05	0.00237967	0.000879053	end_moderate
AGO	0.000229538	-0.00565269	-0.00202316	0.00257532	end_moderate
ALB	6.15339e-05	-0.000643153	0.00140664	0.00171424	end_moderate
ARE	3.4963e-05	-0.00149268	3.22601e-05	0.00184131	end_moderate
ARG	0.000224949	-0.00204521	0.00333649	0.00126536	end_moderate
ARM	0.000121279	0	0.0020478	4.70804e-05	end_moderate
AUS	0.000557409	-0.00444573	0.00569758	-4.09279e-06	end_moderate
AUT	2.84295e-05	-8.10503e-05	0.000548615	0.00103376	end_moderate
AZE	0.000109925	-0.00334085	0.000958044	0.000829159	end_moderate
BDI	0.000465364	0	0.00100196	0.00442239	end_moderate
BEL	3.84557e-05	0	0.000167605	0.00129613	end_moderate
BEN	0.000414828	0	-0.00274218	0.0032803	end_moderate
BFA	0.000449677	0	0.000535832	0.00114286	end_moderate
BGD	0.000278759	-0.000944695	-2.90884e-05	2.62049e-05	end_moderate
BGR	8.52681e-05	-0.00132604	0.00156405	0.00170747	end_moderate
BHS	6.87054e-05	0	8.68864e-05	0.000287835	end_moderate
BIH	0.000101045	-0.00182413	0.00185286	0.00140613	end_moderate
BLR	3.85043e-05	0	0.000717726	0.000301228	end_moderate
BLZ	0.000287727	0	0.00967065	0.00188407	end_moderate
BOL	9.09639e-05	-0.0023786	0.0188813	0.00282049	end_moderate
BRA	6.52314e-05	-0.00196344	0.00947896	0.000686748	end_moderate
BRN	5.65177e-05	-0.0477327	-0.00351261	0.000532632	end_moderate
BTN	0.016845	0	0.00140078	6.61926e-05	end_moderate
BWA	0.000519224	-0.00341259	0.00240272	0.00232308	end_moderate
CAF	0.00070578	0	0.0375842	0.00479338	end_moderate
CAN	0.000246914	-0.00659473	0.0173304	0.00123988	end_moderate
CHE	2.8748e-05	0	5.28972e-05	0.000592718	end_moderate
CHL	7.10037e-05	-3.79651e-05	0.00179863	0.000482903	end_moderate
CHN	0.000156276	-0.00248122	0.00045724	3.03469e-05	end_moderate
CIV	0.000116862	-8.80808e-05	0.00198649	0.00240588	end_moderate
CMR	0.000289407	-7.52461e-06	-0.00581962	0.00270543	end_moderate
COD	0.00046322	0	-0.00899683	0.00582139	end_moderate
COG	0.000144814	-0.0018833	0.0147379	0.00281157	end_moderate
COL	2.84757e-05	-0.00432391	0.00486784	0.00197851	end_moderate
COM	0.000123438	0	0.000480728	0.00214658	end_moderate
CPV	0.00106079	0	0.000728674	0.000660595	end_moderate
CRI	7.18044e-06	0	0.00061269	0.00164032	end_moderate
CUB	3.79046e-05	-0.000886639	0.00127892	0.000516834	end_moderate
CYP	7.55668e-06	0	0.000349538	0.00102188	end_moderate
CZE	3.78768e-05	-0.000476491	0.000462478	0.000553474	end_moderate
DEU	3.10654e-05	-0.000273094	0.000348216	0.00025887	end_moderate
DJI	0.000500509	0	0.000990688	0.0016526	end_moderate
DNK	2.44444e-05	-0.000619547	0.000316709	0.000841351	end_moderate
DOM	2.67839e-05	0	0.000370915	0.00042138	end_moderate
DZA	0.000489791	-0.004662	0.000381536	0.000625387	end_moderate
ECU	2.31308e-05	-0.0038415	0.00379433	0.00163666	end_moderate
EGY	0.000247247	-0.00130028	5.43995e-05	0.00142939	end_moderate
ERI	0.00205452	0	0.00696699	0.00263343	end_moderate
ESP	4.28999e-05	0	0.000623774	0.000792469	end_moderate
EST	3.46505e-05	0	0.00201961	0.000698831	end_moderate
ETH	0.000491245	0	0.00174536	0.00343216	end_moderate
FIN	2.17171e-05	0	0.0024119	0.000858287	end_moderate
FJI	7.43422e-05	0	0.0112156	0.00102378	end_moderate
FRA	3.67539e-05	0	0.000493167	0.000808529	end_moderate
GAB	5.17186e-05	-0.000274005	0.0312069	0.00243217	end_moderate
GBR	2.17262e-05	-0.000737385	0.000136074	7.86689e-05	end_moderate
GEO	9.87994e-05	0	0.00193988	0.000180169	end_moderate
GHA	0.000206904	0	0.000662617	7.08758e-05	end_moderate
GIN	0.000141556	0	0.000801297	0.00405265	end_moderate
GMB	0.000109986	0	-7.62842e-05	0.0020153	end_moderate
GNB	0.000219212	0	-0.00298642	0.00246795	end_moderate
GNQ	6.34213e-05	0	0.00217092	0.00208973	end_moderate
GRC	2.34409e-05	-0.000274639	0.000649934	0.00137455	end_moderate
GTM	4.17551e-05	-4.58634e-05	0.000605882	0.00284759	end_moderate
GUY	0.000225541	0	0.176609	0.00150075	end_moderate
HKG	1.44244e-07	0	2.62533e-06	0.000788897	end_moderate
HND	5.91299e-05	0	0.00259172	0.00179977	end_moderate
HRV	6.0291e-05	0	0.00135024	0.00153185	end_moderate
HTI	9.11225e-06	0	0.000333604	0.00195472	end_moderate
HUN	7.28262e-05	-0.000191637	0.000593645	0.0025167	end_moderate
IDN	0.000119214	-0.00291611	0.000872409	0.000683291	end_moderate
IND	0.000267076	-0.00120889	7.6601e-05	0.000277946	end_moderate
IRL	3.01018e-05	-4.45648e-05	0.000566232	0.00033338	end_moderate
IRN	0.000222149	-0.00834123	0.000924503	0.000979783	end_moderate
IRQ	0.000424274	-0.00440716	0.000757626	0.00181082	end_moderate
ISL	0.000371993	0	0.00129616	1.0797e-05	end_moderate
ISR	2.17693e-05	-0.000778461	2.15307e-05	0.0013368	end_moderate
ITA	2.58489e-05	-0.00013396	0.000300336	0.00126966	end_moderate
JAM	4.25365e-05	0	0.00114687	0.00050521	end_moderate
JOR	0.000224482	0	0.000329558	0.00190306	end_moderate
JPN	8.41286e-06	-5.809e-06	0.000289164	0.000927768	end_moderate
KAZ	0.000443729	-0.00302766	0.00718137	4.18707e-05	end_moderate
KEN	0.000512382	0	0.0019928	0.00269152	end_moderate
KGZ	0.000339275	-0.000156433	0.00691454	0.00022463	end_moderate
KHM	0.000262682	0	0.00106809	0.000449317	end_moderate
KOR	1.97008e-05	0	-0.000390411	0.000358889	end_moderate
KWT	2.79601e-05	-0.00484993	4.55787e-05	0.00127295	end_moderate
LAO	0.000650332	-0.00183117	0.00549992	0.0010861	end_moderate
LBN	4.5106e-05	0	7.28324e-05	0.000976084	end_moderate
LBR	0.000221547	0	-0.0172798	0.00387949	end_moderate
LBY	0.00159807	-0.00712854	0.000668177	0.000601274	end_moderate
LKA	0.000147797	0	0.000203344	0.000968262	end_moderate
LSO	0.00024433	0	0.0015139	0.00255633	end_moderate
LTU	6.14772e-05	0	0.00147611	0.000319861	end_moderate
LUX	5.03087e-05	0	9.51694e-05	0.00076091	end_moderate
LVA	5.04067e-05	0	0.00267004	0.000114757	end_moderate
MAR	0.000141018	0	0.000218967	0.00153812	end_moderate
MDA	0.000193859	0	0.000442079	0.00217315	end_moderate
MDG	0.000456698	0	0.00282681	0.00247555	end_moderate
MEX	3.38358e-05	-0.00181862	0.00069467	0.00131583	end_moderate
MKD	0.000114239	-0.00100138	0.00108806	0.00195452	end_moderate
MLI	0.00189131	0	0.00325764	0.00299765	end_moderate
MMR	0.000416424	-0.00306289	0.00716128	0.000780744	end_moderate
MNE	0.000160287	-0.001225	0.0018059	0.00133556	end_moderate
MNG	0.0119784	-0.00750972	0.0221842	0.000578169	end_moderate
MOZ	0.000319246	-0.00440168	-0.000707156	0.00234606	end_moderate
MRT	0.00719715	0	0.00429185	0.00230753	end_moderate
MUS	0.000259729	0	5.54739e-06	0.000889328	end_moderate
MWI	0.000331478	0	-0.000881675	0.00321921	end_moderate
MYS	3.30361e-05	-0.00548559	-0.00204346	0.000897636	end_moderate
NAM	0.00139582	0	0.00667345	0.00290695	end_moderate
NCL	2.89053e-05	0	-0.01688	0.000519881	end_moderate
NER	0.00175677	-0.000186846	0.00330788	0.00246066	end_moderate
NGA	0.00024688	-0.00110155	-0.000244731	0.00218671	end_moderate
NIC	4.32159e-05	0	0.00622706	0.00343654	end_moderate
NLD	1.16726e-05	-0.000196123	7.81055e-05	0.000966634	end_moderate
NOR	2.51693e-05	-0.0147824	0.00107954	0.000605729	end_moderate
NPL	0.00110162	0	0.000176865	-1.05121e-05	end_moderate
NZL	0.000102206	-0.00037993	0.00409786	0.00072103	end_moderate
OMN	0.000455742	-0.00791246	0.000408928	0.00136657	end_moderate
PAK	0.000480497	-0.00101261	0.000122524	0.000662936	end_moderate
PAN	4.29116e-06	0	0.00223119	0.00146397	end_moderate
PER	1.96587e-05	-0.0012627	0.00890534	0.00168336	end_moderate
PHL	0.000122827	-0.000434459	-0.000249133	0.00104498	end_moderate
PNG	0.00091612	-0.000457128	0.016367	0.00130471	end_moderate
POL	5.47215e-05	-0.000710908	0.000756914	0.000361211	end_moderate
PRI	2.11158e-06	0	0.000342456	0.000375169	end_moderate
PRT	2.71383e-05	0	0.000540002	0.000699998	end_moderate
PRY	0.000148702	0	0.0155879	0.00187497	end_moderate
PSE	-1.81629e-06	0	5.33754e-05	0.00177106	end_moderate
PYF	1.91788e-06	0	0	0.000942152	end_moderate
QAT	6.07077e-06	-0.0107195	9.64502e-06	0.00169396	end_moderate
ROU	9.61104e-05	-0.000936208	0.00168788	0.00231621	end_moderate
RUS	9.788e-05	-0.00385889	0.00700286	0.000797224	end_moderate
RWA	0.000359671	0	0.000531635	0.00423624	end_moderate
SAU	0.000244249	-0.00513524	0.000556895	0.00162983	end_moderate
SDN	0.00104155	0	0.0014672	0.00258661	end_moderate
SEN	0.000321569	0	0.000239428	0.00150682	end_moderate
SLB	8.75149e-05	0	-0.0113102	0.000877761	end_moderate
SLE	0.000247004	0	0.00346081	0.00309377	end_moderate
SLV	1.49963e-05	0	0.000443841	0.00153803	end_moderate
SOM	0.0357394	0	0.140979	0.00281103	end_moderate
SRB	0.00016433	-0.00291653	0.00135062	0.00199138	end_moderate
SUR	5.96697e-05	0	0.0852584	0.00173883	end_moderate
SVK	4.33442e-05	0	0.000855447	0.000556258	end_moderate
SVN	4.37686e-05	-0.000172955	0.000777464	0.00158788	end_moderate
SWE	2.31942e-05	0	0.00252212	0.000562608	end_moderate
SWZ	0.000654616	0	0.000854066	0.00194211	end_moderate
SYR	0.000179916	-8.59752e-05	0.000340541	0.00170679	end_moderate
TCD	0.00220282	-0.000607462	0.00213136	0.00288766	end_moderate
TGO	0.000325875	0	-0.00162574	0.00065319	end_moderate
THA	0.000102854	-0.00155108	0.00025976	0.000906557	end_moderate
TJK	0.000292533	0	0.0036448	3.09835e-05	end_moderate
TKM	0.000276856	-0.00469139	0.00272601	0.000380979	end_moderate
TLS	0.000189563	0	0.00160645	0.00126347	end_moderate
TTO	6.08056e-06	-0.0131628	0.000768286	0.000477963	end_moderate
TUN	0.000171525	-0.000220519	0.000110328	0.00101659	end_moderate
TUR	4.3676e-05	-0.000283562	0.000739706	0.000405556	end_moderate
TZA	0.000285388	-5.38196e-05	3.74862e-05	0.00236527	end_moderate
UGA	0.000378965	0	0.000229447	0.00287222	end_moderate
UKR	0.000102951	-0.000565829	0.000369426	0.0018735	end_moderate
URY	0.000170164	0	0.00373272	0.00113689	end_moderate
USA	5.61902e-05	-0.00210617	0.00127589	0.000799281	end_moderate
UZB	0.000212555	-0.000200683	0.00115527	0.000597124	end_moderate
VEN	3.56155e-05	-0.00803716	0.00510862	0.00133146	end_moderate
VNM	0.000208762	-0.00197283	4.83932e-05	0.000454377	end_moderate
VUT	9.76549e-05	0	0.0145109	0.00126311	end_moderate
WSM	0.000105012	0	0.0102486	0.00078945	end_moderate
YEM	0.000554089	0	0.000610229	0.00156474	end_moderate
ZAF	0.000181544	-0.0149258	0.00139314	0.00187556	end_moderate
ZMB	0.000242698	0	-0.00534953	0.00394442	end_moderate
ZWE	0.000597794	-0.00394695	-0.0039096	0.00450081	end_moderate
AFG	0.0427649	-0.000152494	0.0280521	0.00126694	mid_stringent
AGO	0.00216717	-0.0234187	0.00128359	0.000157384	mid_stringent
ALB	0.00133833	-0.00249086	0.00425975	0.00020304	mid_stringent
ARE	0.000292491	-0.00414929	9.68041e-05	0.00120386	mid_stringent
ARG	0.00218825	-0.00477768	0.0115472	0.00115274	mid_stringent
ARM	0.00246234	0	0.00600116	0.000128831	mid_stringent
AUS	0.0106721	-0.00960008	0.0143259	0.000160079	mid_stringent
AUT	0.000567747	-0.00029569	0.00204496	0.000656326	mid_stringent
AZE	0.00207285	-0.0140798	0.00336824	-6.0672e-05	mid_stringent
BDI	0.00938854	0	0.0527175	0.000778457	mid_stringent
BEL	0.000788641	0	0.000647	0.00102601	mid_stringent
BEN	0.00575329	0	0.0239276	0.000171307	mid_stringent
BFA	0.00694968	0	0.0125267	-0.00010181	mid_stringent
BGD	0.00653799	-0.00437846	-0.000418022	-0.000480712	mid_stringent
BGR	0.00185902	-0.00228431	0.0046702	0.000325468	mid_stringent
BHS	0.00143696	0	-0.00247564	0.000712232	mid_stringent
BIH	0.00209496	-0.00305017	0.00551844	0.000188233	mid_stringent
BLR	0.000757187	0	0.00371744	0.000792325	mid_stringent
BLZ	0.00422999	0	0.054356	0.000824833	mid_stringent
BOL	0.00133905	-0.00758608	0.0667736	0.00166357	mid_stringent
BRA	0.000588751	-0.00486171	0.0196025	0.00144635	mid_stringent
BRN	0.000278344	-0.180147	-0.000425208	0.00034253	mid_stringent
BTN	0.341588	0	0.0105128	-0.000438628	mid_stringent
BWA	0.00238804	-0.00187902	0.0100892	0.00144124	mid_stringent
CAF	0.0112131	0	1.12641	0.000770196	mid_stringent
CAN	0.00434346	-0.0245567	0.0598024	0.00149143	mid_stringent
CHE	0.000617141	0	0.000105828	0.000515878	mid_stringent
CHL	0.000610493	-7.87296e-05	0.00537549	0.000280813	mid_stringent
CHN	0.00247725	-0.00619421	0.00214024	-6.02015e-05	mid_stringent
CIV	0.00168674	-0.000367475	0.0183967	0.000854732	mid_stringent
CMR	0.00332049	-2.95286e-05	0.0730411	0.000113029	mid_stringent
COD	0.0103005	0	0.19311	0.0016931	mid_stringent
COG	0.00158182	-0.008515	0.0854263	0.00029277	mid_stringent
COL	0.000385441	-0.00939246	0.0192832	0.000911392	mid_stringent
COM	-0.000732244	0	0.00550612	0.00254383	mid_stringent
CPV	-0.00977528	0	0.00622129	0.000174725	mid_stringent
CRI	8.19513e-05	0	-0.00025678	0.00141268	mid_stringent
CUB	0.000511555	-0.00224228	0.00157106	0.000312878	mid_stringent
CYP	7.31838e-05	0	0.00177821	0.00030263	mid_stringent
CZE	0.000839737	-0.000866718	0.00182881	0.00109407	mid_stringent
DEU	0.000585349	-0.000499941	0.00121997	0.000663622	mid_stringent
DJI	0.00494413	0	0.00684778	0.00140138	mid_stringent
DNK	0.000904386	-0.00242359	0.000879001	0.000426704	mid_stringent
DOM	0.000320653	0	0.00232388	0.000846472	mid_stringent
DZA	0.00291907	-0.0125872	0.00421637	0.000808582	mid_stringent
ECU	0.000296345	-0.0127085	0.0113899	0.000558208	mid_stringent
EGY	0.00215271	-0.00418223	0.000306573	0.000657499	mid_stringent
ERI	0.0447282	0	0.0776001	0.00169845	mid_stringent
ESP	0.000785844	0	0.00184648	0.000389995	mid_stringent
EST	0.00104866	0	0.00768813	0.000282345	mid_stringent
ETH	0.00719923	0	0.0315149	0.00141729	mid_stringent
FIN	0.000435002	0	0.00813385	0.00023683	mid_stringent
FJI	-0.00216343	0	0.0622343	0.000134133	mid_stringent
FRA	0.000656432	0	0.00169338	0.000851169	mid_stringent
GAB	0.000551121	-0.000910178	0.11855	0.000705139	mid_stringent
GBR	0.000623334	-0.00279381	0.000542881	0.000232813	mid_stringent
GEO	0.0021148	0	0.00746477	0.000274317	mid_stringent
GHA	0.00263872	0	0.0118748	0.00018764	mid_stringent
GIN	0.00301961	0	0.0167541	0.00266256	mid_stringent
GMB	0.00220334	0	-0.000195095	0.000505552	mid_stringent
GNB	0.0144152	0	-0.00928225	0.0010858	mid_stringent
GNQ	0.000256993	0	0.00542789	0.000696352	mid_stringent
GRC	0.000471498	-0.000475474	0.00222748	0.000308222	mid_stringent
GTM	0.000701268	-0.000199307	0.00168468	0.000917396	mid_stringent
GUY	0.00350944	0	0.485753	0.00102743	mid_stringent
HKG	1.56375e-06	0	1.07182e-05	0.000133098	mid_stringent
HND	0.00105643	0	0.0198689	0.00141584	mid_stringent
HRV	0.00121116	0	0.00347796	0.000152765	mid_stringent
HTI	0.000223932	0	0.00506273	0.000313217	mid_stringent
HUN	0.0015999	-0.000453541	0.00239085	0.000443873	mid_stringent
IDN	0.00154834	-0.0106002	0.0103001	0.000589569	mid_stringent
IND	0.00484956	-0.00458786	0.000747843	-0.000278256	mid_stringent
IRL	0.0012711	-0.000164658	0.00202239	0.000382509	mid_stringent
IRN	0.00168343	-0.020132	0.00450798	0.000881988	mid_stringent
IRQ	0.0036332	-0.0159673	0.00409476	0.000400665	mid_stringent
ISL	0.0135186	0	-0.000890136	-5.21266e-07	mid_stringent
ISR	0.000181497	-0.00197872	0.000131454	0.000293668	mid_stringent
ITA	0.000487792	-0.000481068	0.000764388	0.000479856	mid_stringent
JAM	0.000341934	0	0.00532889	0.00030137	mid_stringent
JOR	0.00240116	0	0.00222044	0.000225191	mid_stringent
JPN	0.000156575	-1.78299e-05	0.000866455	0.000544139	mid_stringent
KAZ	0.00780059	-0.00790985	0.0246141	0.000424027	mid_stringent
KEN	0.00587239	0	0.0188529	0.000246386	mid_stringent
KGZ	0.00973356	-0.000346265	0.0327568	-2.71568e-05	mid_stringent
KHM	0.00514958	0	0.0166606	0.000537242	mid_stringent
KOR	0.000367838	0	0.000272044	6.81086e-05	mid_stringent
KWT	0.000224364	-0.0139541	0.000141237	0.000714687	mid_stringent
LAO	0.0199002	-0.00522246	0.0556688	-2.6005e-05	mid_stringent
LBN	0.000350701	0	0.000354187	0.00056778	mid_stringent
LBR	0.00426778	0	0.0699578	0.00199634	mid_stringent
LBY	0.00761191	-0.0206648	0.00357811	0.000305416	mid_stringent
LKA	0.00107743	0	0.00330044	0.000935658	mid_stringent
LSO	0.00371197	0	0.0373748	0.000957906	mid_stringent
LTU	0.00131788	0	0.00530024	0.000462387	mid_stringent
LUX	0.00101745	0	0.000358887	0.0013223	mid_stringent
LVA	0.00146927	0	0.00924335	0.000252162	mid_stringent
MAR	0.00182733	0	0.0031043	0.00105087	mid_stringent
MDA	0.00427161	0	0.00175543	0.000477285	mid_stringent
MDG	0.00938175	0	0.0723625	0.00210632	mid_stringent
MEX	0.00046484	-0.0048379	0.00251407	0.000560183	mid_stringent
MKD	0.00253166	-0.00190591	0.00386763	0.000179296	mid_stringent
MLI	0.0233861	0	0.031494	0.00034419	mid_stringent
MMR	0.00780521	-0.0103409	0.025533	-0.000185833	mid_stringent
MNE	0.00342861	-0.00213088	0.00691266	0.000114932	mid_stringent
MNG	0.198577	-0.0191836	0.0869672	0.00112657	mid_stringent
MOZ	0.00672971	-0.00574882	-0.00821578	0.000716438	mid_stringent
MRT	0.0510778	0	0.0272689	0.00151729	mid_stringent
MUS	0.0012124	0	6.24162e-05	0.00095486	mid_stringent
MWI	0.00669064	0	-0.00399755	0.000805977	mid_stringent
MYS	0.000641207	-0.0257817	0.00549911	0.000387579	mid_stringent
NAM	0.0189416	0	0.00215503	0.00178223	mid_stringent
NCL	0.000305674	0	-0.0166293	0.000322595	mid_stringent
NER	0.0319272	-0.000413739	0.0561491	-0.000146599	mid_stringent
NGA	0.0030951	-0.00672635	0.00354874	-3.43213e-05	mid_stringent
NIC	0.00102693	0	0.0581188	0.00196063	mid_stringent
NLD	0.000273644	-0.000698335	0.000299477	0.000392524	mid_stringent
NOR	0.00191345	-0.0559491	0.00255943	0.000185286	mid_stringent
NPL	0.0336509	0	0.00478778	-0.000970827	mid_stringent
NZL	0.0023049	-0.00156475	0.0165441	0.000197549	mid_stringent
OMN	0.00269049	-0.0206523	0.00169579	0.00117661	mid_stringent
PAK	0.0115938	-0.00588585	0.00128385	0.000302497	mid_stringent
PAN	6.04963e-05	0	0.00677904	0.000951398	mid_stringent
PER	0.000232813	-0.00305852	0.0266351	0.000833675	mid_stringent
PHL	0.000962893	-0.00177752	0.00381141	0.000533687	mid_stringent
PNG	0.00102794	-0.00344289	0.110522	0.000262531	mid_stringent
POL	0.00114602	-0.00127279	0.00259168	0.000594108	mid_stringent
PRI	2.69287e-05	0	0.000901917	0.000434702	mid_stringent
PRT	0.000438988	0	0.00143931	0.000119162	mid_stringent
PRY	0.00126429	0	0.0532218	0.00175419	mid_stringent
PSE	0.000466406	0	0.000289936	0.000159327	mid_stringent
PYF	2.68102e-05	0	0	0.000198969	mid_stringent
QAT	0.000164137	-0.0210944	3.17726e-05	0.000758522	mid_stringent
ROU	0.00213765	-0.00233299	0.00527929	0.000408216	mid_stringent
RUS	0.00178101	-0.0107804	0.027917	0.000470353	mid_stringent
RWA	0.00529902	0	0.00557257	0.000585244	mid_stringent
SAU	0.00145922	-0.0152939	0.00201619	0.000758389	mid_stringent
SDN	0.0110604	0	0.00999851	6.42437e-05	mid_stringent
SEN	0.00530589	0	0.00337826	0.000843573	mid_stringent
SLB	-0.00346164	0	0.040212	0.000410321	mid_stringent
SLE	0.00498356	0	0.0306128	0.00187409	mid_stringent
SLV	0.000187297	0	0.00295825	0.00151482	mid_stringent
SOM	0.565699	0	1.89041	0.00212862	mid_stringent
SRB	0.00337996	-0.00507684	0.00431963	0.000283954	mid_stringent
SUR	0.00189726	0	0.246877	0.000569187	mid_stringent
SVK	0.000960764	0	0.00322876	0.000628952	mid_stringent
SVN	0.00089164	-0.000298094	0.00311687	0.000668321	mid_stringent
SWE	0.000477441	0	0.00906123	0.000405793	mid_stringent
SWZ	0.00733316	0	0.00898865	0.000643138	mid_stringent
SYR	0.00190001	-0.000365879	0.00206612	0.000585108	mid_stringent
TCD	0.0241887	-0.00476978	0.0456695	-0.000316569	mid_stringent
TGO	0.00519762	0	0.0276736	0.000342295	mid_stringent
THA	0.00150133	-0.00672602	0.00311802	0.000447289	mid_stringent
TJK	0.00717391	0	0.017408	0.000163246	mid_stringent
TKM	0.00510708	-0.0132464	0.00969347	0.000825554	mid_stringent
TLS	0.00545091	0	0.00809361	0.000836225	mid_stringent
TTO	6.65705e-05	-0.0259202	0.000888024	0.000265133	mid_stringent
TUN	0.00224642	-0.000530878	0.00155377	0.000578603	mid_stringent
TUR	0.000766058	-0.000581029	0.00287182	0.000726021	mid_stringent
TZA	0.00409986	-0.00027007	0.0168575	0.000649432	mid_stringent
UGA	0.0062213	0	0.00634048	0.000279985	mid_stringent
UKR	0.00189651	-0.00126056	0.00158503	0.000689378	mid_stringent
URY	0.00160927	0	0.0105337	0.00104761	mid_stringent
USA	0.00100711	-0.00704133	0.00407843	0.00140757	mid_stringent
UZB	0.00502564	-0.000384839	0.00491915	0.000119399	mid_stringent
VEN	0.000459758	-0.0230847	0.0223607	0.00152027	mid_stringent
VNM	0.00364175	-0.00874402	0.00328893	5.87928e-05	mid_stringent
VUT	-0.00234724	0	0.132797	0.000252276	mid_stringent
WSM	7.52956e-05	0	0.044601	0.000334703	mid_stringent
YEM	0.00631846	0	0.00492229	0.00244573	mid_stringent
ZAF	0.00149176	-0.00835728	0.00630352	0.000921105	mid_stringent
ZMB	0.00380715	0	-0.0221466	0.00164275	mid_stringent
ZWE	0.0112664	-0.00529252	-0.00116273	0.00326696	mid_stringent
